# Supplementary material
Source: Springer Nature journal article supplement (https://www.springermedizin.de/resource/supplementary/13046_2012_561_MOESM1_ESM.pdf/9662452)

**Color Key**

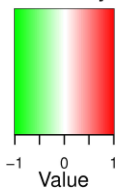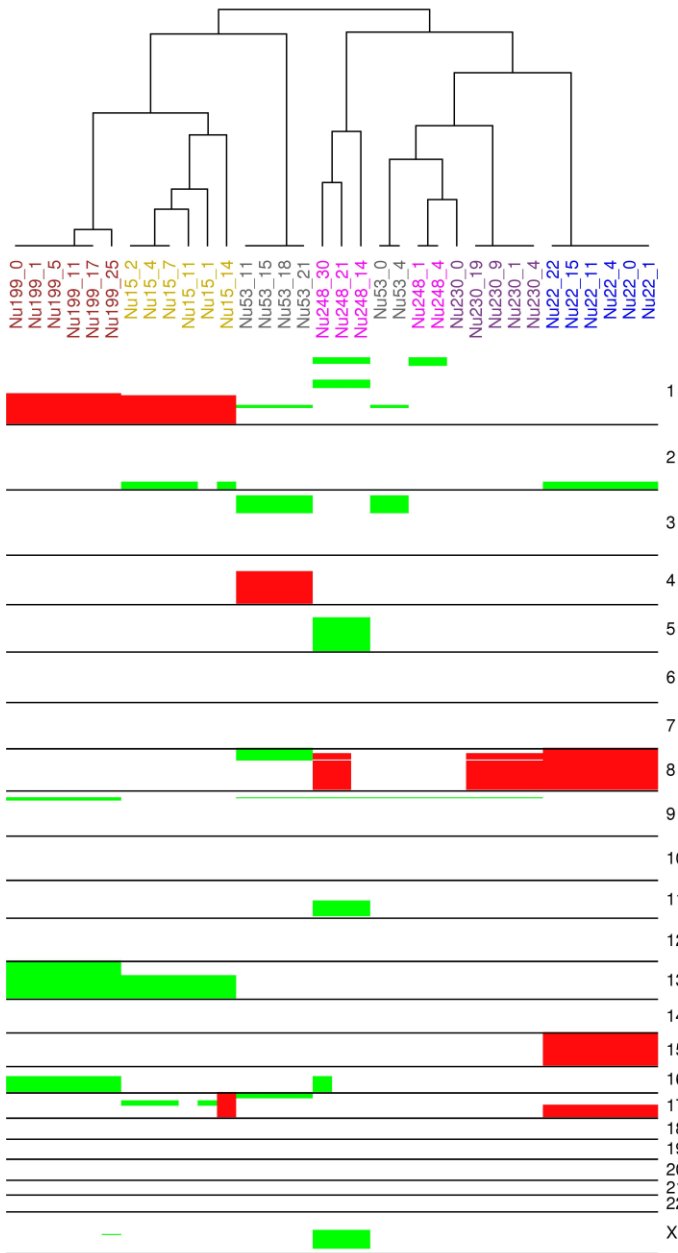

Chromosome number

Xenograft passage samples

Supplement: MOESM1 [file 9662452]
